# Supplementary material for: PRRT2 deficiency induces paroxysmal kinesigenic dyskinesia by regulating synaptic transmission in cerebellum
Source: PubMed Central journal article supplement (PMC5752836; doi:10.1038/cr.2017.128), 2017-10-20
Supplement: cr2017128x3.pdf [file cr2017128x3.pdf]

# Supplementary information, Figure S3

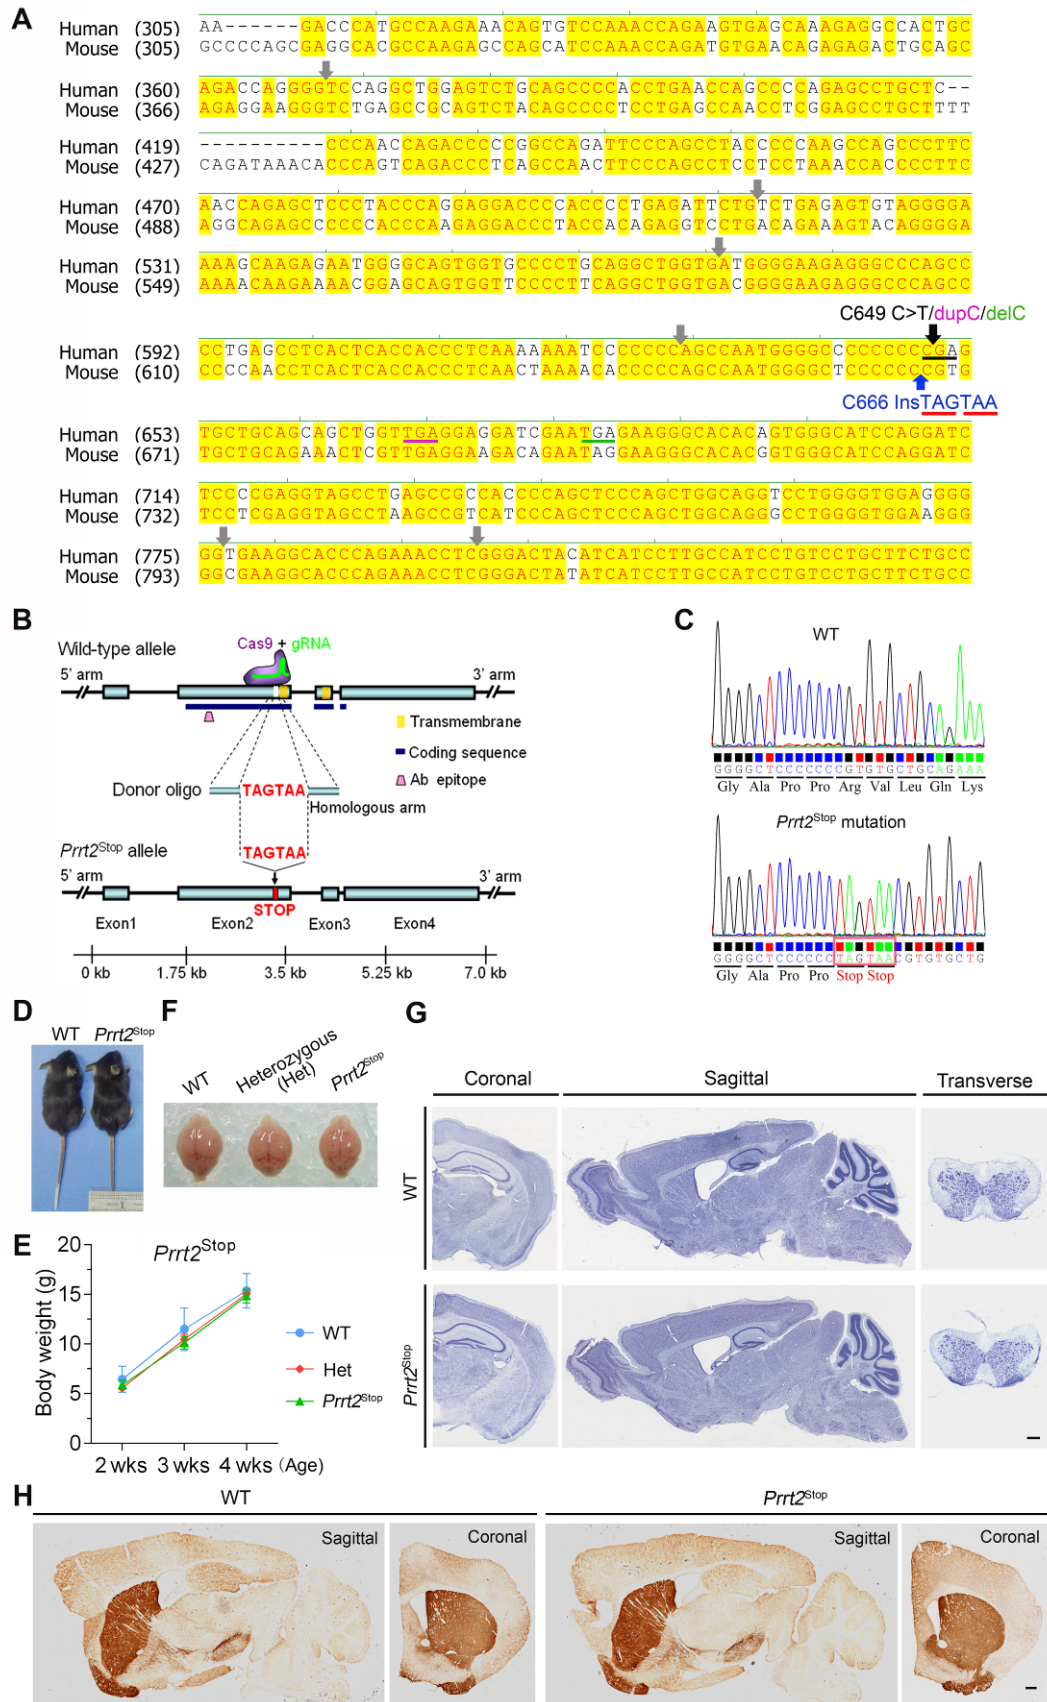

**Figure S3 Generation of mutant mice to mimic the hot-spot mutation of human *PRRT2* in patients with PKD.** (A) Shown is partial sequence alignment of human *PRRT2* (NM\_145239.2) and mouse *Prirt2* (NM\_001102563.1), indicating their identical overall organization and strong sequence conservation. Identical nucleotide sequences are shaded in yellow. A mutational hotspot (black arrow) of nine cytosines (c.649) in human *PRRT2* was responsible for most PKD cases, introducing a stop codon (underlined by black, pink, green bars, respectively) in advance prior to the sequences coding two transmembrane domains (807-867 and 954-1014, respectively). We thus planned to generate *Prirt2*-mutant mice with insertion of two stop codons (red bars) into C666 sites (blue arrow) of murine *Prirt2* to mimic the hot-spot nonsense mutation at the C649 site of human *PRRT2* gene in PKD patients. Some of other mutated sites found in PKD patients are indicated by gray arrows. (B) Schematic diagrams of generation of mutant mouse with incorporation of two stop codons (TAGTAA) into its endogenous *Prirt2* gene (referred to as *Prirt2*<sup>Stop</sup>). Cas9/Crispa-mediated gene-targeting strategy was used to insert stop codons into murine *Prirt2*. Nucleotide sequence coding the epitope of specific PRRT2 antibody used in this study is indicated by pink trapezoid box. (C) DNA sequencing confirmed the correct incorporation of exogenous nucleotides into the target site of *Prirt2*<sup>Stop</sup> mice. (D) No obvious changes in gross morphology of the mutant mice. (E) No significant changes in body weight (n=7, 14, 8 for WT, heterozygous and homozygous mice, respectively) of the mutant mice. Error bars, mean  $\pm$  SEM. (F) Comparison of brains of mutant mice and their control littermates at 1 month of age. WT, wild-type; Het, heterozygous. (G) Nissl staining of sections from the mouse brains (left panel, coronal; middle panel, sagittal) and spinal cord (right panel) with the indicated genotypes showed that the gross anatomic structure of central nervous system was not apparently altered in *Prirt2*<sup>Stop</sup> mutant mice. Scale bars: 600  $\mu$ m, for brain; 300  $\mu$ m, for spinal cord. (H) Tyrosine hydroxylase (TH) staining of dopaminergic neurons in the substantia nigra and terminals in the striatum showed comparable patterns in both WT and *Prirt2*<sup>Stop</sup> mice. Scale bar, 400  $\mu$ m.
