# Supplementary material for: PRRT2 deficiency induces paroxysmal kinesigenic dyskinesia by regulating synaptic transmission in cerebellum
Source: PubMed Central journal article supplement (PMC5752836; doi:10.1038/cr.2017.128), 2017-10-20
Supplement: cr2017128x8.pdf [file cr2017128x8.pdf]

## Supplementary information, Figure S8

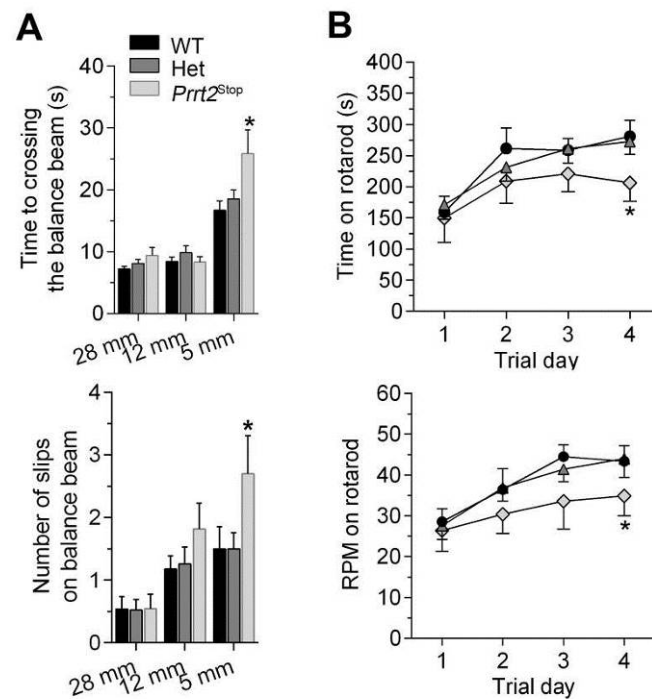

**Figure S8 Impaired performance of *Prrt2*-mutant mice in beam walking and Rotarod test.** (A) Beam balance test of *Prrt2*<sup>Stop</sup> mutants and their WT littermates. (B) *Rota rod* test of *Prrt2*<sup>Stop</sup> mutants and their WT littermates. WT,  $n = 14$ ; heterozygous (Het),  $n = 23$ ; homozygous *Prrt2*<sup>Stop</sup>,  $n = 11$ ; Error bars, mean  $\pm$  SEM. \* $P < 0.05$ , versus WT; two-way ANOVA test.
