# Supplementary material for: PRRT2 deficiency induces paroxysmal kinesigenic dyskinesia by regulating synaptic transmission in cerebellum
Source: PubMed Central journal article supplement (PMC5752836; doi:10.1038/cr.2017.128), 2017-10-20
Supplement: cr2017128x9.pdf [file cr2017128x9.pdf]

## Supplementary information, Figure S9

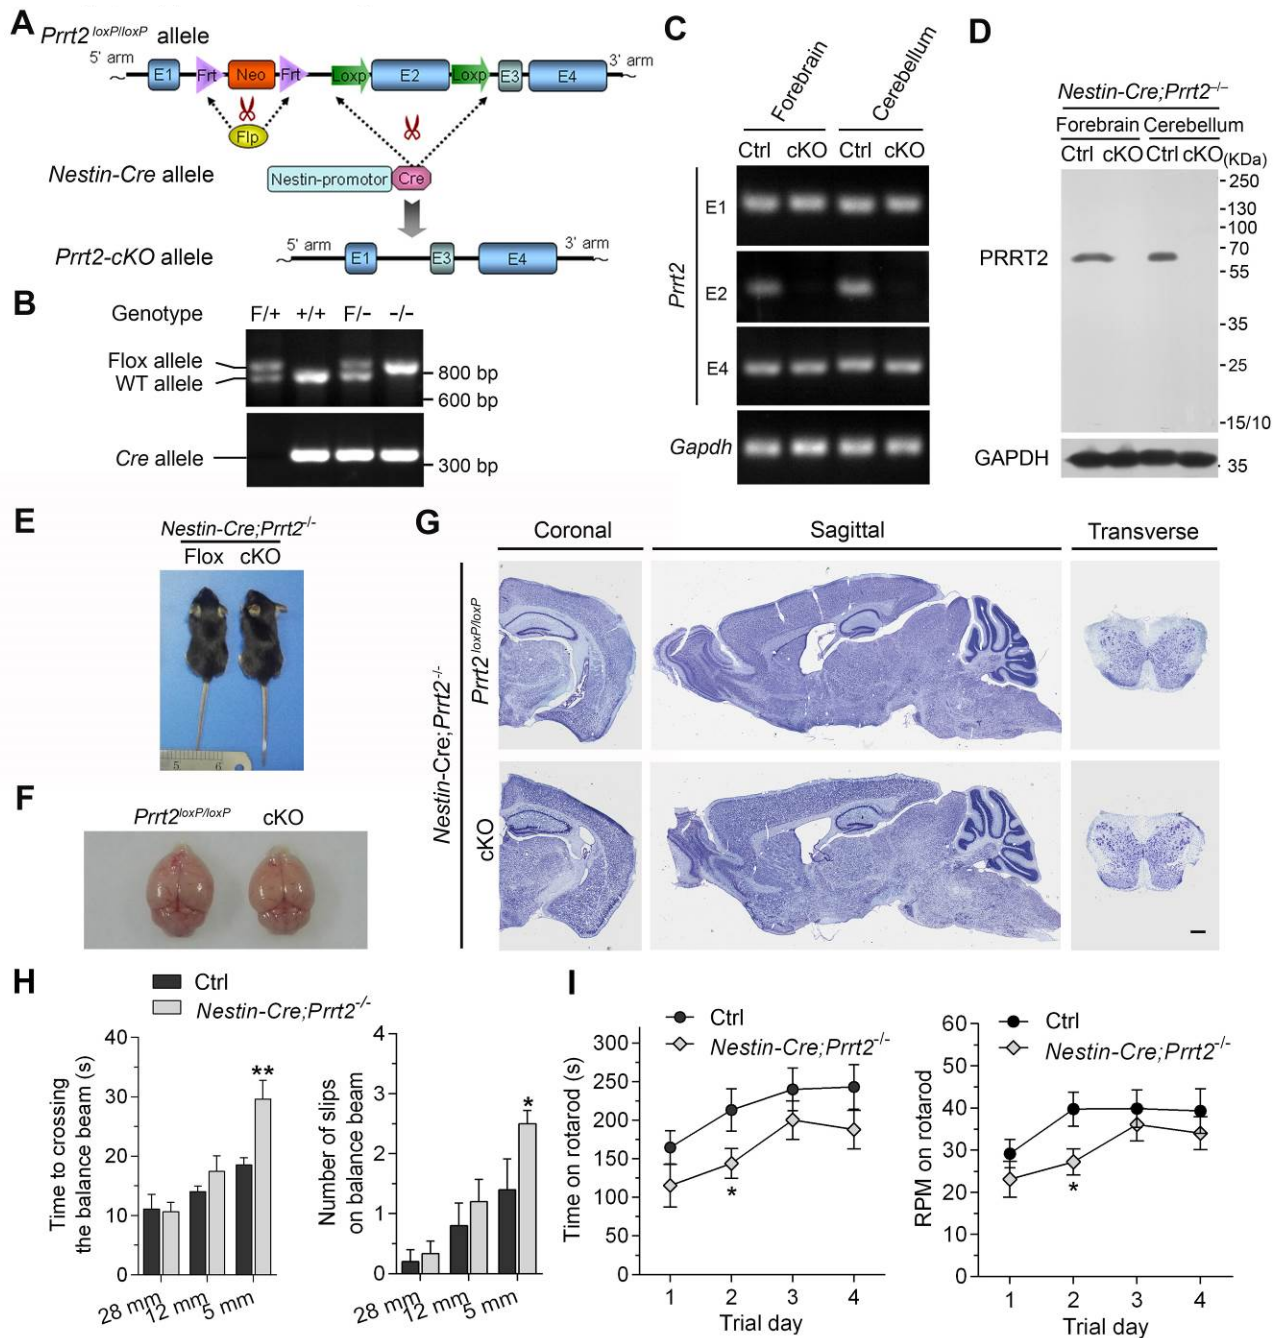

**Figure S9 Generation and verification of *Nestin-Cre;Prrt2*<sup>-/-</sup> mice.** (A) Conditional knockout of *Prrt2* in mouse CNS under the control of *Nestin-Cre*. Exon2 encoding the main part of PRRT2 was flanked by two *loxP* sequences. The *neo* cassette was ultimately deleted from the targeted alleles by *Flp* recombinase. (B) Representative genotyping results of the *Nestin-Cre;Prrt2*<sup>-/-</sup> mice. (C) mRNA expression of *Prrt2* in *Nestin-Cre;Prrt2*<sup>-/-</sup> brain was detected using probes targeting different exons as

indicated. **(D)** Western blot of expression levels of PRRT2 in brains of *Nestin-Cre;Prrt2<sup>-/-</sup>* mice and their control littermates. None residual PRRT2 protein was detected in *Prrt2*-knockout (KO) mouse brains. *Nestin-Cre* and *Prrt2<sup>loxP/loxP</sup>* mice expressed PRRT2 normally. **(E, F)** No obvious changes in gross morphology and brain size of the mutant mice. Error bars, mean  $\pm$  SEM. **(G)** Nissl staining of sections from the mouse brains (left panel, coronal; middle panel, sagittal) and spinal cord (right panel) with the indicated genotypes showed that the gross anatomic structure of central nervous system was not apparently altered in *Nestin-Cre;Prrt2<sup>-/-</sup>* mice. Scale bars: 600  $\mu$ m, for brain; 300  $\mu$ m, for spinal cord. **(H, I)** Impaired performance of *Nestin-Cre;Prrt2<sup>-/-</sup>* mice in both beam balance test **(H)** and *Rota rod* test **(I)**. Ctrl,  $n = 10$ ; *Nestin-Cre;Prrt2<sup>-/-</sup>*,  $n = 8$ . *Nestin-Cre* and *Prrt2<sup>loxP/loxP</sup>* littermates expressing PRRT2 normally were pooled as controls (Ctrl). Error bars, mean  $\pm$  SEM. \* $P < 0.05$  and \*\* $P < 0.01$ , versus Ctrl; two-way ANOVA test.
