# Supplementary material for: PRRT2 deficiency induces paroxysmal kinesigenic dyskinesia by regulating synaptic transmission in cerebellum
Source: PubMed Central journal article supplement (PMC5752836; doi:10.1038/cr.2017.128), 2017-10-20
Supplement: cr2017128x10.pdf [file cr2017128x10.pdf]

## Supplementary information, Figure S10

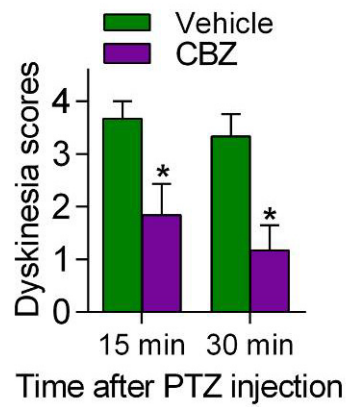

**Figure S10 Effect of CBZ on experimentally induced dyskinesia in mouse models.**

Administration of CBZ alleviated PTZ-induced dyskinesia at the indicated time points.

$n = 6$  per group. \* $P < 0.05$  and \*\*\* $P < 0.001$ , versus vehicle; Student's  $t$ -test.
