# Supplementary material for: PRRT2 deficiency induces paroxysmal kinesigenic dyskinesia by regulating synaptic transmission in cerebellum
Source: PubMed Central journal article supplement (PMC5752836; doi:10.1038/cr.2017.128), 2017-10-20
Supplement: cr2017128x11.pdf [file cr2017128x11.pdf]

## Supplementary information, Figure S11

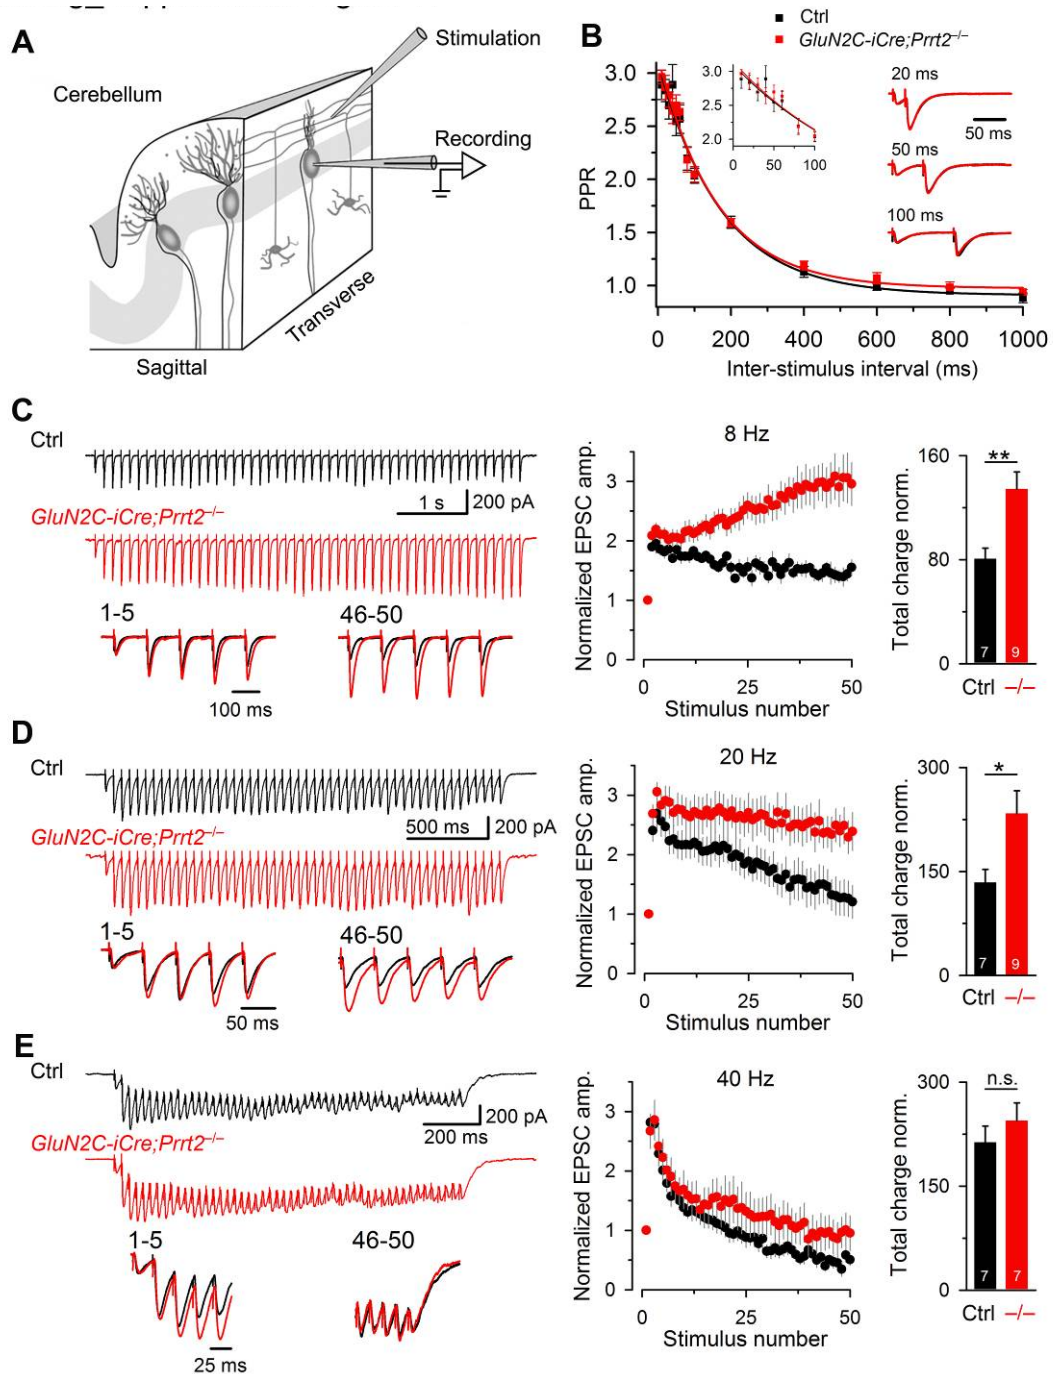

**Figure S11 Increased short-term facilitation of PF-PC synapses in cerebellum of *GluN2C-iCre;Prrt2<sup>-/-</sup>* mice.** (A) Illustration of the electrophysiological recording configuration. (B) Paired-pulse ratio (PPR) at intervals from 10 to 1000 ms in WT littermate and *GluN2C-iCre;Prrt2<sup>-/-</sup>* mice. Mono-exponential fits to the data were shown as solid lines. Left inset shows PPR values at very short ISIs (10-100 ms) on an expanded timescale. Right inset shows examples of paired-pulse traces at 20, 50,

100 ms intervals, scaled to the first EPSC in the pair for each interval. WT,  $n = 7$ ; mutant,  $n = 9$ . (C-E) PF-EPSCs evoked by a stimulus train of 50 pulses at 8 Hz (C), 20 Hz (D), 40 Hz (E) in WT (black) and *GluN2C-iCre;Prmt2<sup>-/-</sup>* (red) mice. Left panels, representative traces of the PF-EPSCs; middle panels, normalized plot of EPSC amplitudes of each spike during trains of stimulations at the indicated frequencies; right panels, total charge transferred (normalized to that of the 1<sup>st</sup> EPSC) during the trains of 50 pulses at different frequencies. The amplitudes of evoked responses or total charge transferred were normalized to that of the 1<sup>st</sup> EPSC (WT, black; mutant, red). Case number is indicated in the bottom of each column. Error bars, mean  $\pm$  SEM. \*\* $P < 0.01$  and \* $P < 0.05$ , versus WT; two-sided unpaired Student's *t*-test.
