# Supplementary material for: PRRT2 deficiency induces paroxysmal kinesigenic dyskinesia by regulating synaptic transmission in cerebellum
Source: PubMed Central journal article supplement (PMC5752836; doi:10.1038/cr.2017.128), 2017-10-20
Supplement: cr2017128x19.pdf [file cr2017128x19.pdf]

## Supplementary information, Table S1

**Table S1 Sequences of PCR Primers Used in This Study**

| Primer          |                          | Direction                                          | Sequence                               | Accession Number          |              |              |
|-----------------|--------------------------|----------------------------------------------------|----------------------------------------|---------------------------|--------------|--------------|
| PCR             | <i>Prrt2</i>             | E1                                                 | Forward                                | CCACCTCCCTTCATTGCTCACA    | NM_001102563 |              |
|                 |                          |                                                    | Reverse                                | CTCAGTTGGTCCCAGTCTCATCC   |              |              |
|                 |                          | E2                                                 | Forward                                | CCCCAACCTCACTCACCACC      |              |              |
|                 |                          |                                                    | Reverse                                | TGCCCTTCCTATTCTGTCTTCCTCA |              |              |
|                 |                          | E4                                                 | Forward                                | CCTTAGCGTCTTCACCCTCC      |              |              |
|                 |                          |                                                    | Reverse                                | CCAAACGGGCAGATCAATT       |              |              |
|                 |                          | E1-E2                                              | Forward                                | TTGCTCACAGACTTGTTCCCTC    |              |              |
|                 |                          |                                                    | Reverse                                | AGCTGCTGGCTGCCATCTT       |              |              |
|                 |                          | E2-E2                                              | Forward                                | GGTAGCCTAAGCCGTCATCC      |              |              |
|                 |                          |                                                    | Reverse                                | GCATAAGCGAAGGCCACAAT      |              |              |
|                 |                          | E3-E4                                              | Forward                                | TGCGTCATCAACTTAGGCG       |              |              |
|                 |                          |                                                    | Reverse                                | CCAGGGATAAGGTTGAGAGGATT   |              |              |
|                 |                          | <i>Gapdh</i>                                       | Forward                                | GGTTGTCTCCTGCGACTTCA      |              | NM_001289726 |
|                 |                          |                                                    | Reverse                                | CCACCACCCTGTTGCTGTAG      |              |              |
| Molecular Clone | <i>Prrt2</i> -shRNA-#1   |                                                    | GAGGAAGACAGAATAGGAA                    | NM_001102563              |              |              |
|                 | <i>Prrt2</i> -shRNA-#2   |                                                    | GCCAGCATCCAAACCAGAT                    | NM_001102563              |              |              |
|                 | Full-length <i>Prrt2</i> | Forward                                            | CGAGCTCAAGCTTCGAATTCCGCC<br>ACCATGGCAG | NM_001102563              |              |              |
| Reverse         |                          | TCACCATGGTGGCGACCGGTGGTT<br>TGTCGTCATCATCCTTATAGTC |                                        |                           |              |              |
