# Supplementary material for: PRRT2 deficiency induces paroxysmal kinesigenic dyskinesia by regulating synaptic transmission in cerebellum
Source: PubMed Central journal article supplement (PMC5752836; doi:10.1038/cr.2017.128), 2017-10-20
Supplement: cr2017128x20.pdf [file cr2017128x20.pdf]

## Supplementary information, Table S2

**Table S2 Commercial Antibodies Used in Western Blot and IHC Experiments.**

| Used in                  | Antibody                               | Company            | Catalog Number  | Titer in Use |
|--------------------------|----------------------------------------|--------------------|-----------------|--------------|
| Western Blot             | Rabbit anti-PRRT2                      | Sigma              | HPA014447-100µl | 1:500        |
|                          | Mouse anti-SYP                         | Synaptic Systems   | 101011          | 1:3000       |
|                          | Mouse anti-MAP2                        | Neuromics          | MO22116         | 1:1000       |
|                          | Mouse anti-VGLUT 1                     | Synaptic Systems   | 135311          | 1:1000       |
|                          | Mouse anti-GluR1                       | Santa Cruz         | SC-55509        | 1:1,000      |
|                          | Mouse anti-NeuN                        | Millipore/Chemicon | MAB377          | 1:1000       |
|                          | Rabbit anti-GFP                        | Molecular Probe    | A-11122         | 1:2,000      |
|                          | Mouse anti-SYT1                        | Millipore          | 573824-200µg    | 1:1500       |
|                          | Rabbit anti-VAMP2                      | Chemicon/Millipore | AB5856-50µl     | 1:2000       |
|                          | Rabbit anti-PSD95                      | Cell Signaling     | 3450s           | 1:3000       |
|                          | Rabbit anti-syntaxin1A                 | Abcam              | Ab41453         | 1:2000       |
|                          | Rabbit anti-syntaxin1B                 | Synaptic Systems   | 110403          | 1:500        |
|                          | Mouse anti-SNAP25                      | Synaptic Systems   | 111011          | 1:5000       |
|                          | Mouse anti-VGAT                        | Synaptic Systems   | 131011          | 1:1000       |
|                          | Mouse anti-Flag                        | Sigma              | F3165           | 1:2000       |
|                          | Mouse anti-HA                          | Roche              | 11867423001     | 1:3000       |
|                          | Mouse anti-Myc tag                     | Upstate/Millipore  | 05-724          | 1:3000       |
|                          | Mouse anti-GAPDH                       | KangCheng          | KC-5G5          | 1:5,000      |
|                          | Goat anti-Actin-HRP                    | Santa Cruz         | SC-1615         | 1:5,000      |
|                          | Goat anti-mouse IgG-HRP                | Santa Cruz         | SC-2031         | 1:2,000      |
| Goat anti-Rabbit IgG-HRP | Santa Cruz                             | SC-2036            | 1:2,000         |              |
| IHC/ICC                  | Mouse anti-MAP2                        | Neuromics          | MO22116         | 1:1000       |
|                          | Mouse anti-SYP                         | Synaptic Systems   | 101011          | 1:1,000      |
|                          | Mouse anti-Cre                         | Chemicon/Millipore | MAB3120         | 1:500        |
|                          | Mouse anti-SYS1                        | Synaptic Systems   | 106001          | 1:1,000      |
|                          | Chicken Anti-GFP                       | Abcam              | ab13970         | 1:3000       |
|                          | Guinea pig anti-synapsin 1,2           | Synaptic Systems   | 106004          | 1:200        |
|                          | AlexaFluo® 488 donkey anti-rabbit IgG  | Invitrogen         | A-21206         | 1:3000       |
|                          | Alexa Fluor® 488 goat anti-chicken IgG | Invitrogen         | A-11039         | 1:3000       |
|                          | Mouse anti-NeuN                        | Millipore/Chemicon | MAB377          | 1:100        |
|                          | Rabbit anti-NeuN                       | Merck/Millipore    | ABN78           | 1:500        |
|                          | Guinea pig anti-PV                     | Chemicon/Millipore | AB15738         | 1:500        |
